# Supplementary material for: A dual-confinement strategy to construct cobalt-based phosphide nanoclusters within carbon nanofibers for bifunctional water splitting electrocatalysts
Source: Royal Society of Chemistry journal article supplement (doi:10.1039/d1dt04359e), 2022-01-01
Supplement: d1dt04359e2.pdf [file d1dt04359e2.pdf]

## Supporting Information

Dual-confinement Strategy to Construct Cobalt based Phosphides  
Nanocluster within Carbon Nanofiber for Bifunctional Water  
Splitting Electrocatalyst

Jie Chen,<sup>a,b,\*</sup> Fuying Huang,<sup>a,b</sup> Sunzai Ke,<sup>a</sup> Jiaxin Shen,<sup>a</sup> Yancai Li,<sup>a,b</sup>  
Fengying Zheng,<sup>a,b</sup> Shunxing Li<sup>a,b,\*</sup>

<sup>a</sup> College of Chemistry, Chemical Engineering and Environment, Minnan  
Normal University, Zhangzhou, 363000, China.

<sup>b</sup> Fujian Province Key Laboratory of Modern Analytical Science and  
Separation Technology, Minnan Normal University, Zhangzhou, 363000,  
China

E-mail: chenj@mnnu.edu.cn; shunxing\_li@aliyun.com; Fax: +86-596-  
2591395; Tel: +86-596-2591395.

## **Experimental**

### **Reagents and chemicals**

Polyacrylonitrile (PAN,  $M_w = 150,000$ ) and Nafion solution was purchased from Sigma-Aldrich Co. Ltd. 2-Methylimidazole (MeIM), cobalt nitrate hexahydrate ( $\text{Co}(\text{NO}_3)_2 \cdot 6\text{H}_2\text{O}$ ), nickel (II) acetylacetonate ( $\text{Ni}(\text{acac})_2$ ) and copper (II) acetylacetonate ( $\text{Cu}(\text{acac})_2$ ) were purchased from Aladdin. N, N-dimethylformamide (DMF) and sodium hypophosphite ( $\text{NaH}_2\text{PO}_2$ ) were purchased from Shantou Xilong Chemical Industry Incorporated Co., Ltd. Commercial Pt/C (20 wt% Pt on Vulcan XC72) and  $\text{RuO}_2$  catalyst were purchased from Sigma-Aldrich Chemical Reagent Co., Ltd. All the reagents have reached the degree of analytical reagent. Ultrapure water (Millipore Milli-Q grade) with a resistivity of 18.2  $\text{M}\Omega$  was used in all the experiments.

### **Synthesis of ZIF-67**

In a typical preparation, 0.45 g  $\text{Co}(\text{NO}_3)_2 \cdot 6\text{H}_2\text{O}$  was dissolved in 3 mL of water, then 5.5 g MeIM was dissolved in 20 mL of water. Those two solutions were mixed ( $\text{Co}^{2+} : \text{MeIM} : \text{H}_2\text{O} = 1 : 58 : 1100$ ) and stirred for 6 h at room temperature, then the resulting purple precipitates were collected by centrifuging, washed with water and methanol subsequently for 3 times, and finally vacuum dried at 80 °C for 24 h.

### **Synthesis of Ni-ZIF-67 and Cu-ZIF-67**

In a typical synthesis, 100 mg ZIF-67 powders were mixed with 50 ml

ethanol by ultra-sonification for 30 min to form a homogeneous dispersion.

20 mg Ni(acac)<sub>2</sub> or Cu(acac)<sub>2</sub> were then added into the dispersion, with rigorously stirring until the ethanol evaporated out, forming Ni-ZIF-67 and Cu-ZIF-67 mixtures, respectively. The mixture was finally vacuum dried at 80 °C for 24 h.

### **Synthesis of ZIF-PAN fiber**

PAN and ZIF-67 were adopted as the carbon and cobalt precursors, respectively, and DMF was chosen as the solvent. First, 0.1 g ZIF-67 was added to 5 ml DMF and stirred for 2 h to form a homogenous solution. Then, 0.5 g PAN was added into the solution and stirred for 2h in a water bath at 80 °C. The as-prepared precursor solution was transferred into a 10 ml syringe with a needle (outer diameter = 0.7mm). An electrospinning unit (Lvna Tech. Co., China) with a high voltage of 13.5 kV was applied, and a constant distance of 15 cm was regulated between the needle and rotation collector. The electrospun composite was collected on an aluminum foil in the collector with a flow rate of 2 ml h<sup>-1</sup>. The composite was then peeled off from the collector and stabilized at 60 °C for overnight in a vacuum oven. The as-synthesized ZIF-PAN fiber was placed at the middle of a porcelain boat and NaH<sub>2</sub>PO<sub>2</sub> (mass ratio 1:10) was placed at the upstream side. The porcelain boat was put in a tube furnace and heated to 350 °C with a ramp rate of 2 °C·min<sup>-1</sup> and kept for 2 h. Then the ZIF-

PAN fiber was carbonized at 700 °C for another 2 h under nitrogen atmosphere with a heating rate of 5 °C min<sup>-1</sup>. The final product was named CoP<sub>x</sub>-CNFs. For comparison, ZIF-67 was also treated using the same process and named CoP<sub>x</sub>-CPHs. Similarly, the bimetallic CoNiP<sub>x</sub> and CoCuP<sub>x</sub> samples were prepared using the Ni-ZIF-67 and Cu-ZIF-67 as the precursors.

### **Materials characterization**

The morphology and microstructure of the catalysts were characterized by scanning electron microscopy (SEM, Hitachi S-4800), transmission electron microscopy (TEM, FEI Tecnai G20) and high-resolution transmission electron microscopy (HRTEM, FEI Tecnai F20) operated at 200 kV. Powder X-ray diffraction (XRD) patterns were collected on a Rigaku D/max 2500 diffract meter with Cu K radiation ( $\lambda=1.54056 \text{ \AA}$ ). The Co, Ni and Cu contents of above samples were determined by ICP-MS (PerkinElmer NexION 300X), and the C, N, P contents were analyzed by CHN elemental analysis (Vario MACRO). The X-ray photoelectron spectroscopy (XPS) were performed by an ESCALAB 250 Xi XPS system of Thermo Scientific, where the analysis chamber was  $1.5 \times 10^{-9}$  mbar and the X-ray spot was 500 nm.

### **Electrochemical measurements**

The electrochemical measurements were carried on an electrochemical workstation (CHI 660E, CH Instruments, Shanghai) using a three-electrode

analysis system. For the preparation of the working electrode, 4 mg  $\text{CoP}_x$ -CPHs was dispersed in 1 mL DMF by sonication (To ensure the same amount of active substance, the loading of  $\text{CoP}_x$ -CNFs was 20 mg), then 20  $\mu\text{L}$  of 5 wt% Nafion solution was added until a homogeneous suspension formed. Next, 10  $\mu\text{L}$  of the above suspension was drop-casted onto a glassy carbon electrode ( $d = 3 \text{ mm}$ ,  $S = 0.07065 \text{ cm}^2$ ) to give a mass loading of about  $0.5 \text{ mg cm}^{-2}$ . An Ag/AgCl (0.3 M KCl) electrode was used as the reference electrode and graphite rod as the counter electrode. The potential measured against an Ag/AgCl electrode was converted to the potential versus the reversible hydrogen electrode (RHE) according the formulation:  $E (\text{vs. RHE}) = E (\text{vs. Ag/AgCl}) + 0.059 \times \text{pH} + 0.210$ . Linear sweep voltammetry (LSV) polarization curves for HER and OER were both carried out with a scan rate of  $10 \text{ mV s}^{-1}$  in  $\text{N}_2$ -saturated condition, and all the polarization curves were without  $iR$ -correction. EIS was performed at open circuit potential and 200 mV overpotential within the frequency range of 0.1 to 100 kHz and an a.c. voltage of 10 mV. Because of the less content of the second metal, the loading of bimetallic  $\text{CoNiP}_x$  and  $\text{CoCuP}_x$  samples were the same as  $\text{CoP}_x$  samples (4 mg for  $\text{CoNiP}_x$  and  $\text{CoCuP}_x$  CPHs, 20 mg for  $\text{CoNiP}_x$  and  $\text{CoCuP}_x$  CNFs). A two-electrode water electrolyze device was assembled using  $\text{CoNiP}_x$ -CNFs paper ( $1 \times 2 \text{ cm}$ ) prepared from the ZIF-PAN film after the phosphidation and carbonization treatment as a bifunctional electrocatalyst for both OER and

HER. The loading mass of this self-supported CoNiP<sub>x</sub>-CNFs electrode was 10 mg cm<sup>-2</sup>. The electrocatalytic activity was examined by measuring the LSV curve in 1.0 M KOH solution with a scan rate of 10 mV s<sup>-1</sup>.

To prepare Pt/C and RuO<sub>2</sub> electrode, 4 mg Pt/C or RuO<sub>2</sub> powder and 20 μL 5 wt% Nafion solution were dispersed in 1 mL DMF solvent by 30 min sonication to form an ink. Then 10 μL catalyst ink was loaded on glassy carbon electrode and air-dried at room temperature.

The faradaic efficiency was calculated using the formula  $\eta = n(\text{gas})_{\text{generation}}/n(\text{gas})_{\text{theory}}$ . The hydrogen and oxygen generated from cathode and anode could be collected and measured in 1 h of durability test at current density of 10 mA cm<sup>-2</sup>. The theoretical O<sub>2</sub> yields were calculated as follows:  $n(\text{O}_2) = Q/(nF)$ , where  $n(\text{O}_2)$  is the number of moles of oxygen produced,  $Q$  is the charge passed through the electrodes,  $F$  is the Faradaic constant (96485 C mol<sup>-1</sup>), and  $n$  is the number of electrons transferred during water splitting (4 mol of electrons per mole of O<sub>2</sub>); the theoretical H<sub>2</sub> yields were calculated in the same way as O<sub>2</sub> yields except 4 mol of electrons were transferred per 2 mol of H<sub>2</sub>.

The turnover frequency (TOF) of CoNiP<sub>x</sub>-CNFs electrocatalyst was calculated according to the following equation:  $\text{TOF} = j \times S / (4 \times F \times n)$ , where  $j$  is the current density obtained at overpotential of 300 mV,  $S$  is the surface area of the electrode,  $F$  is the Faraday efficiency (96485 C mol<sup>-1</sup>) and  $n$  is the number of moles of the Ni<sub>x</sub>Co<sub>y</sub>P<sub>z</sub> ( $x=0.1, y=0.9, z=3$ ) on the electrodes.

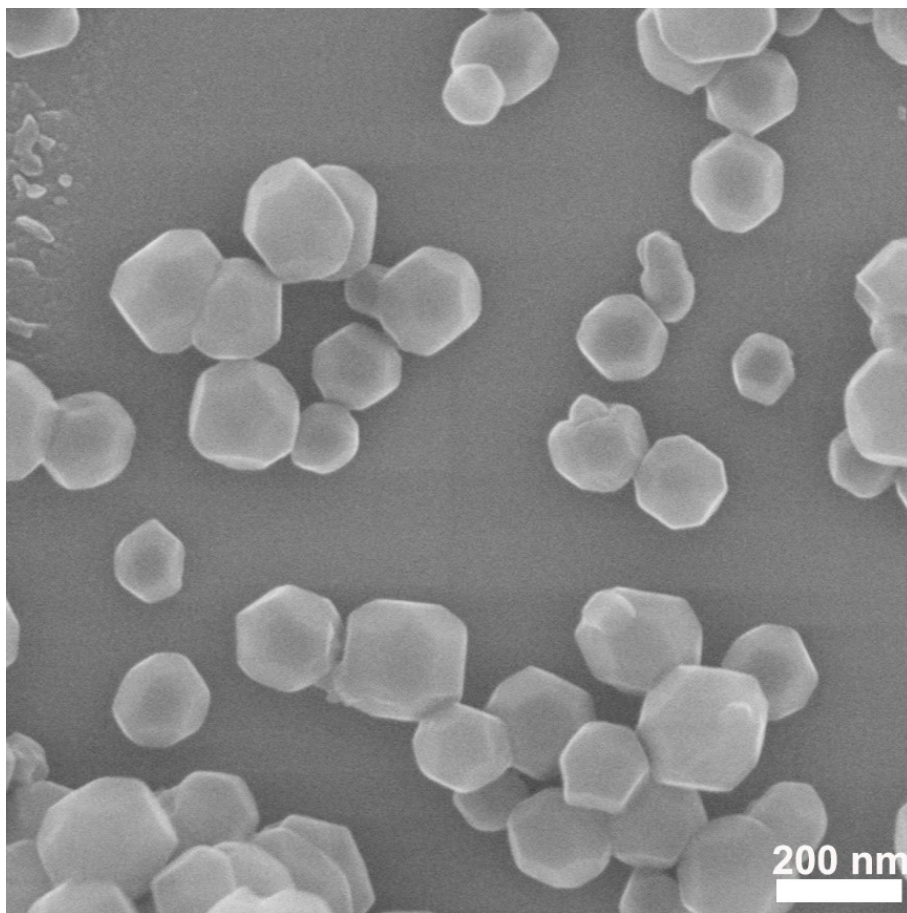

**Figure S1.** SEM image of Co-ZIF-67 polyhedron.

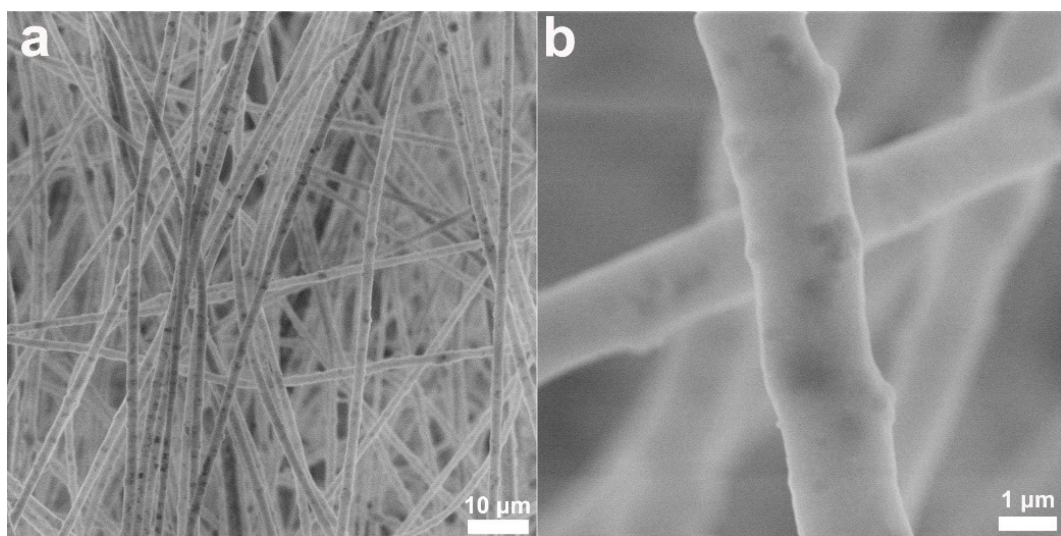

**Figure S2.** SEM images of ZIF-PAN fiber in the (a) large and (b) small scales.



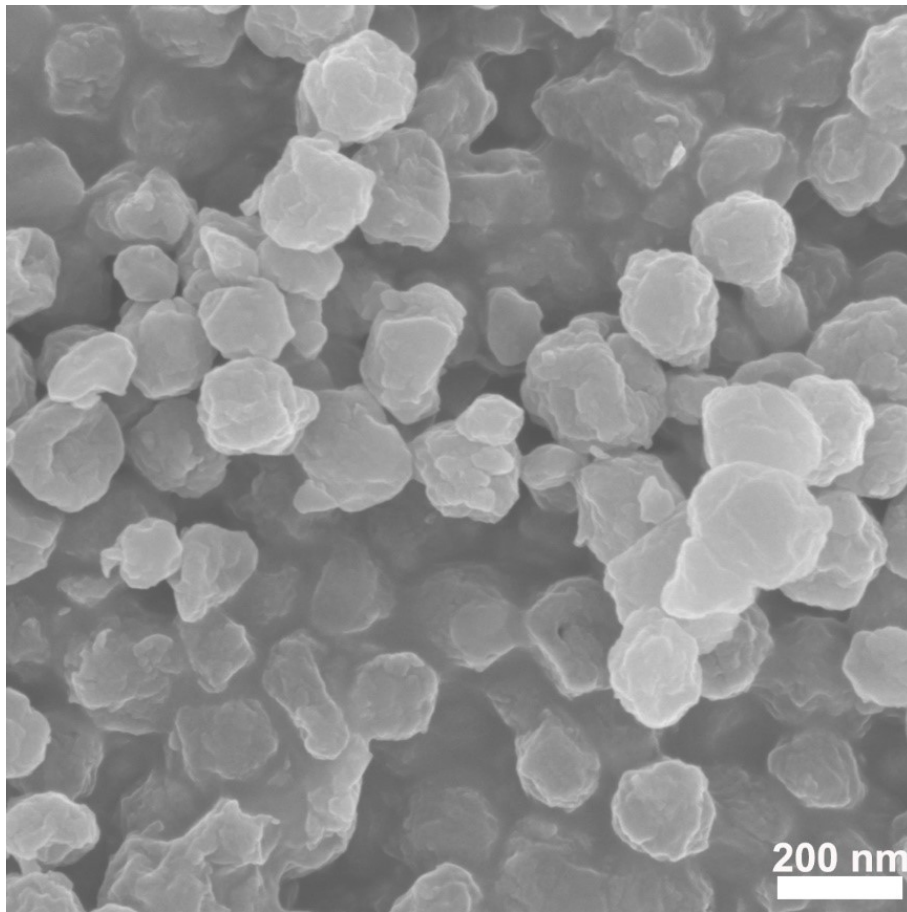

**Figure S3.** SEM image of CoP<sub>x</sub>-CPHs.

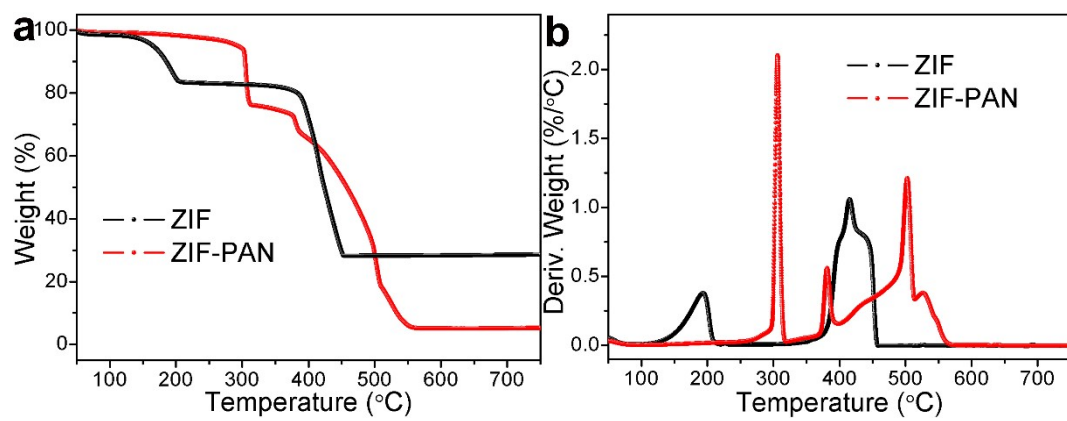

**Figure S4.** (a) TG and (b) DTG curves of ZIF and ZIF-PAN samples.

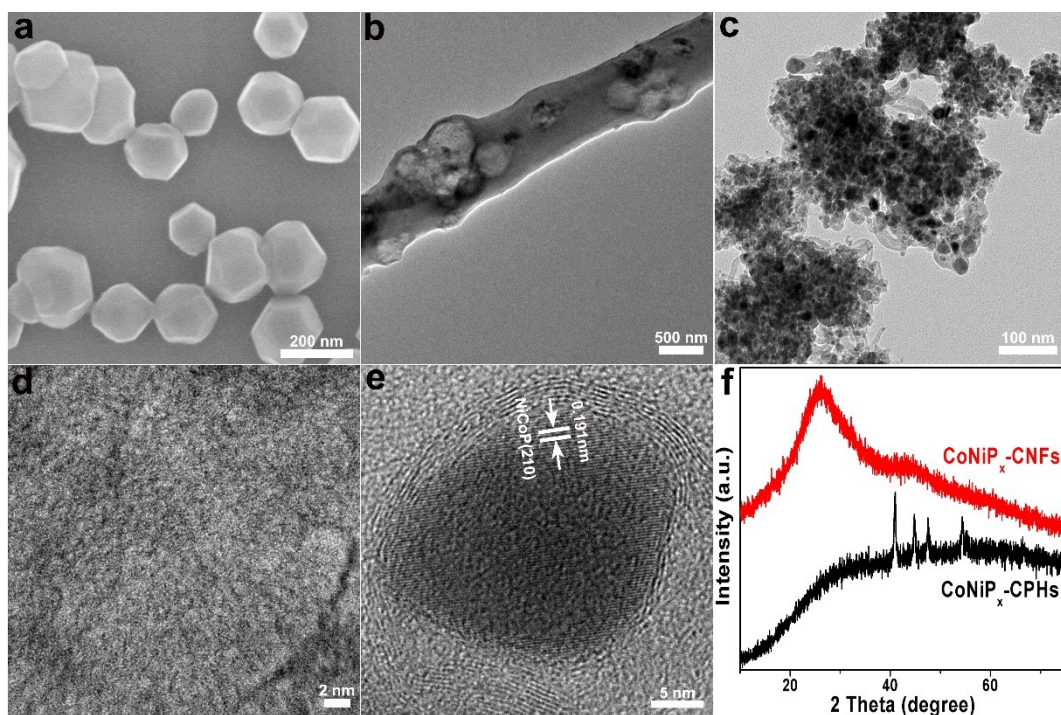

**Figure S5.** (a) SEM image of Ni-ZIF-67 polyhedron. TEM images of (b) CoNiP<sub>x</sub>-CNFs and (c) CoNiP<sub>x</sub>-CPHs. HRTEM images of (d) CoNiP<sub>x</sub>-CNFs and (e) CoNiP<sub>x</sub>-CPHs. (f) XRD patterns of CoNiP<sub>x</sub>-CNFs and CoNiP<sub>x</sub>-CPHs.

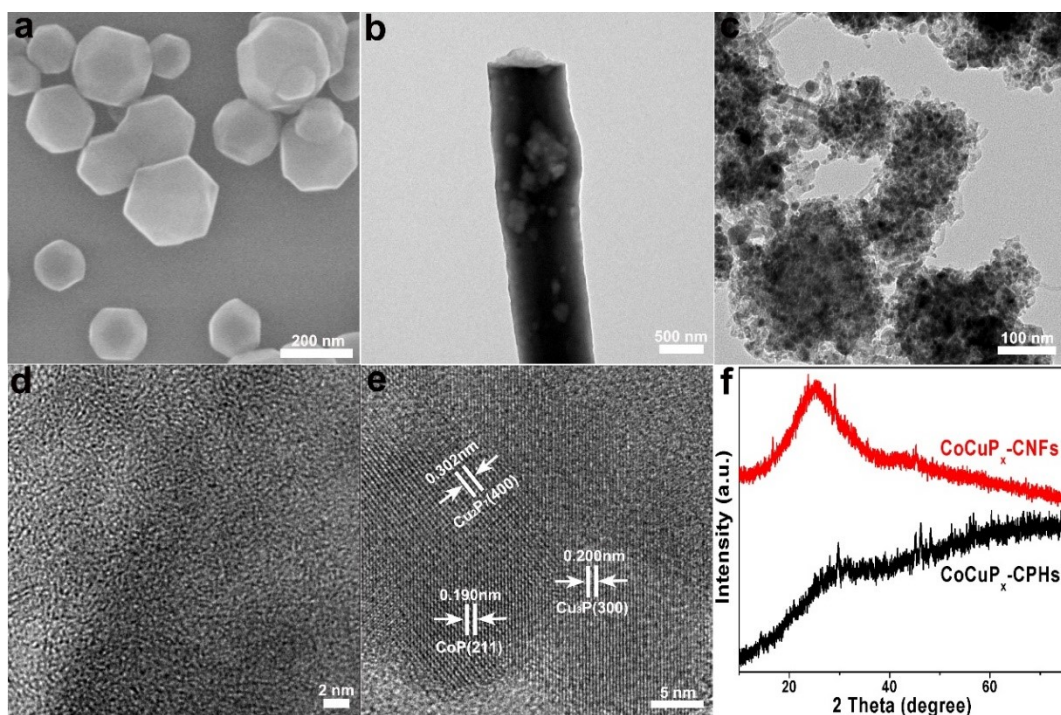

**Figure S6.** (a) SEM image of Cu-ZIF-67 polyhedron. TEM images of (b)  $\text{CoCuP}_x$ -CNFs and (c)  $\text{CoCuP}_x$ -CPHs. HRTEM images of (d)  $\text{CoCuP}_x$ -CNFs and (e)  $\text{CoCuP}_x$ -CPHs. (f) XRD patterns of  $\text{CoCuP}_x$ -CNFs and  $\text{CoCuP}_x$ -CPHs.

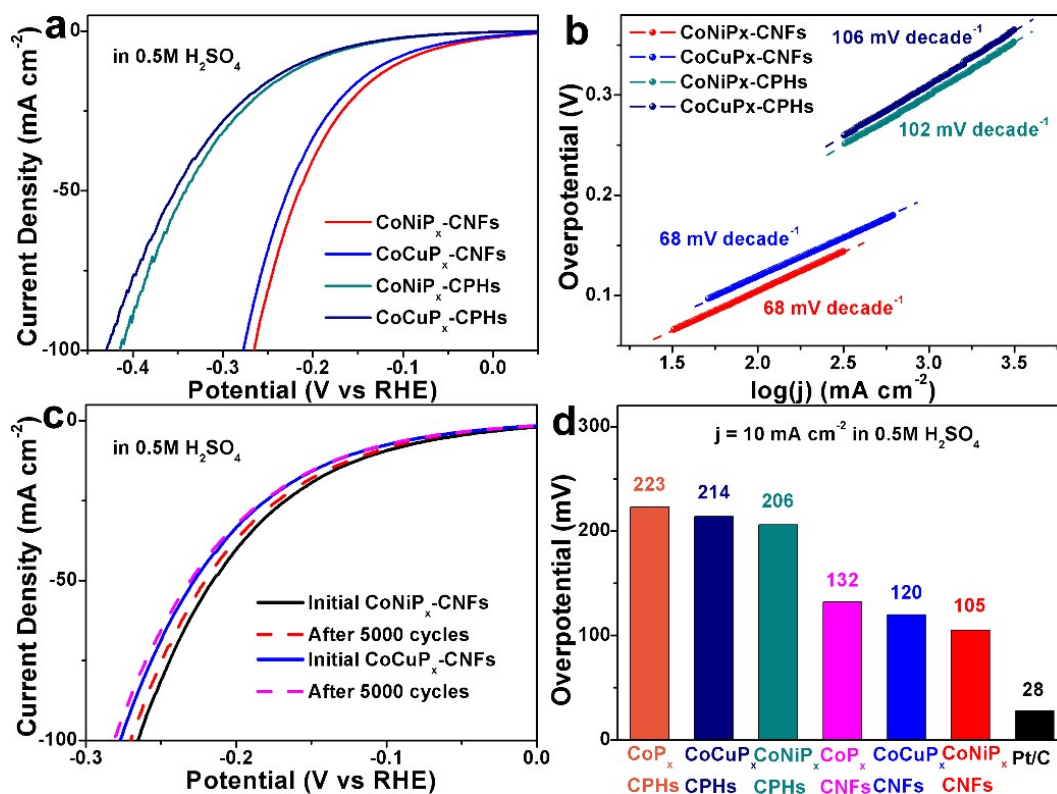

**Figure S7.** Electrochemical characterizations of CoNiP<sub>x</sub> and CoCuP<sub>x</sub> electrocatalysts for HER activity. (a) Polarization curves obtained in 0.5 M H<sub>2</sub>SO<sub>4</sub> at 10 mV s<sup>-1</sup> for CoNiP<sub>x</sub>-CNFs, CoNiP<sub>x</sub>-CPHs, CoCuP<sub>x</sub>-CNFs and CoCuP<sub>x</sub>-CPHs samples. (b) Tafel plots of the corresponding samples. (c) Polarization curves recorded in 0.5 M H<sub>2</sub>SO<sub>4</sub> at 10 mV s<sup>-1</sup> for CoNiP<sub>x</sub>-CNFs and CoCuP<sub>x</sub>-CNFs before and after 5000 cycles from 0.5 to -0.5 V vs RHE at 100 mV s<sup>-1</sup> under acid condition. (d) The overpotential of the corresponding electrodes obtained at current density of 10 mA cm<sup>-2</sup> in 0.5 M H<sub>2</sub>SO<sub>4</sub>.

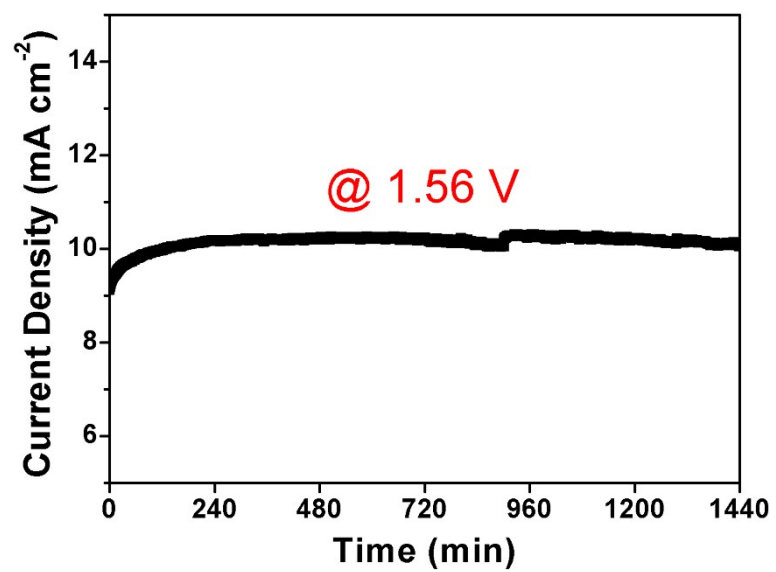

**Figure S8.** The time-dependent chronoamperometry test of CoNiP<sub>x</sub>-CNFs electrocatalyst at applied potential of 1.56 V (vs. RHE) in 1.0 M KOH.

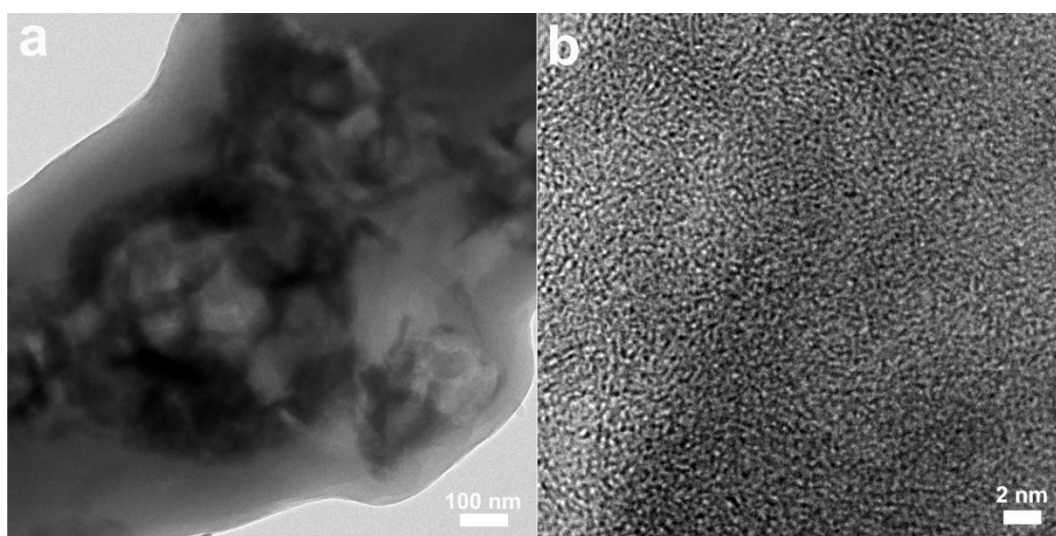

**Figure S9.** (a) TEM and (b) HRTEM images of  $\text{CoNiP}_x\text{-CNFs}$  electrocatalyst after 24 h chronoamperometry test.

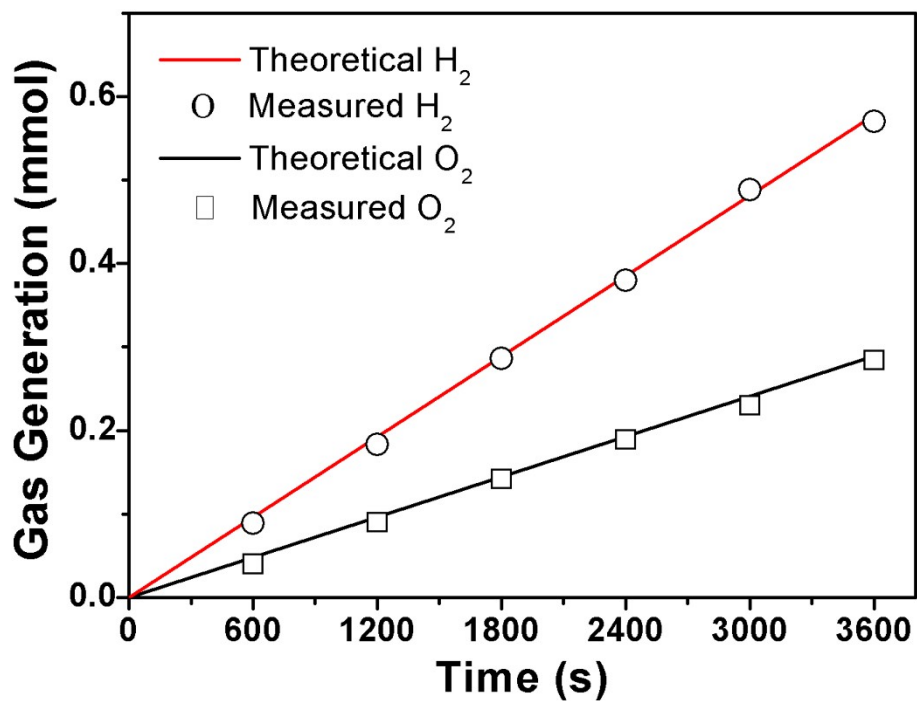

**Figure S10.** Faradaic efficiency of H<sub>2</sub> and O<sub>2</sub> production for overall water splitting.



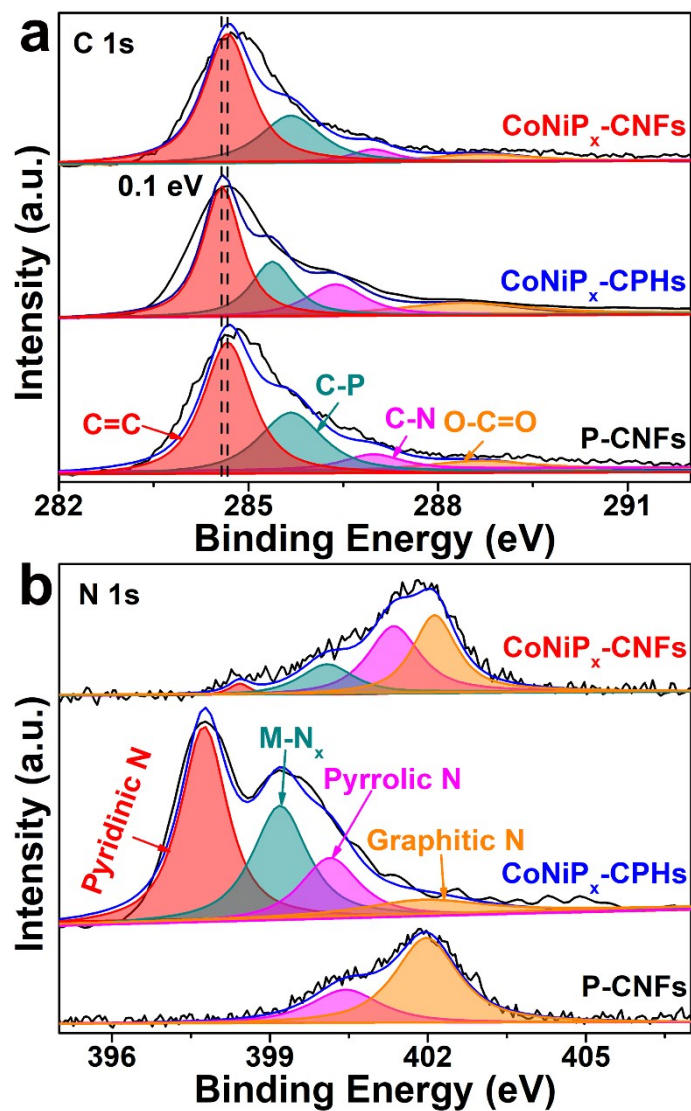

**Figure S11.** XPS spectra of (a) C 1s and (b) N 1s for P-CNFs, CoNiP<sub>x</sub>-CNFs and CoNiP<sub>x</sub>-CPHs.

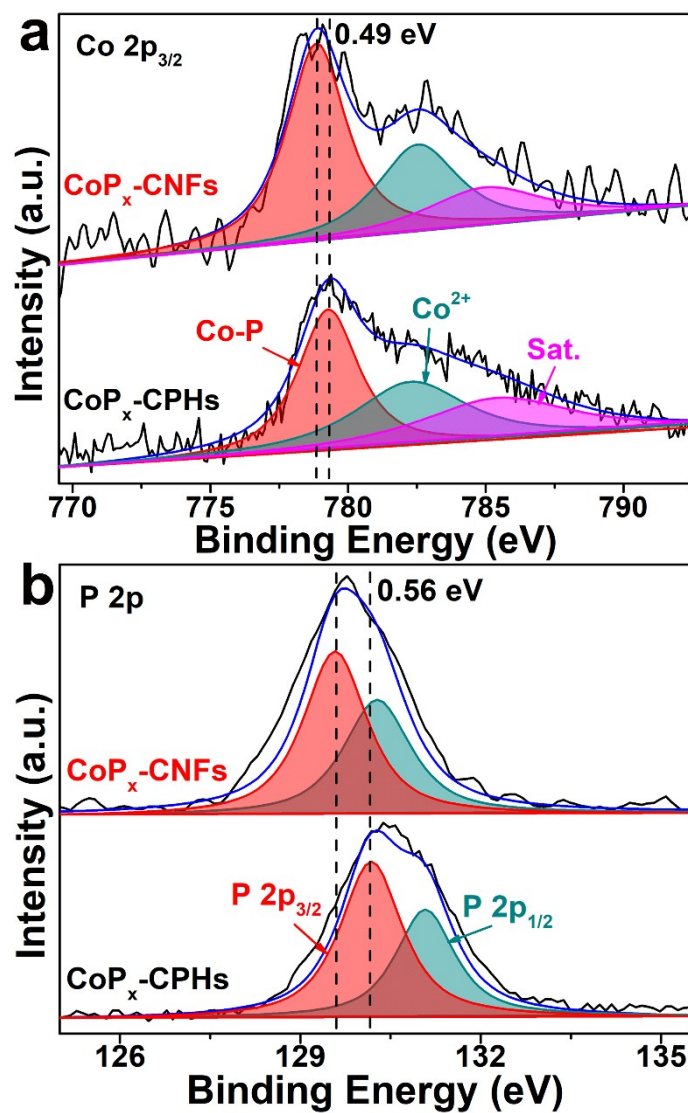

**Figure S12.** XPS spectra of (a) Co 2p<sub>3/2</sub> and (c) P 2p for  $\text{CoP}_x\text{-CNFs}$  and  $\text{CoP}_x\text{-CPHs}$ .

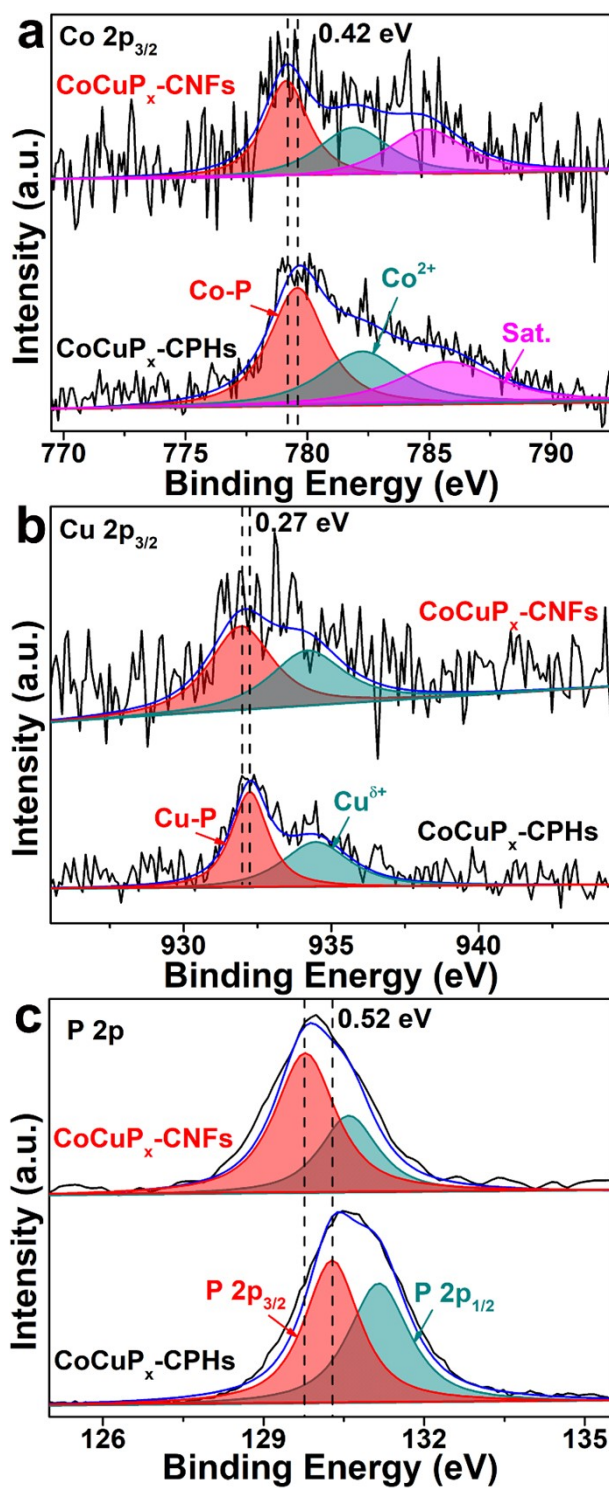

**Figure S13.** XPS spectra of (a) Co 2p<sub>3/2</sub>, (b) Cu 2p<sub>3/2</sub> and (c) P 2p for CoCuP<sub>x</sub>-CNFs and CoCuP<sub>x</sub>-CPHs.

**Table S1.** The characteristic data of the Co-based phosphide samples

| <b>Samples</b>           | <b>Element content (%)</b> |                 |                 |                |                |                |
|--------------------------|----------------------------|-----------------|-----------------|----------------|----------------|----------------|
|                          | Co <sup>a</sup>            | Ni <sup>a</sup> | Cu <sup>a</sup> | P <sup>b</sup> | C <sup>b</sup> | N <sup>b</sup> |
| CoP <sub>x</sub> -CNFs   | 2.47                       | 0               | 0               | 4.52           | 62.31          | 11.85          |
| CoNiP <sub>x</sub> -CNFs | 2.62                       | 0.30            | 0               | 4.64           | 64.85          | 10.88          |
| CoCuP <sub>x</sub> -CNFs | 2.57                       | 0               | 0.24            | 4.57           | 65.18          | 11.26          |
| CoP <sub>x</sub> -CPHs   | 11.16                      | 0               | 0               | 10.08          | 48.06          | 15.78          |
| CoNiP <sub>x</sub> -CPHs | 10.89                      | 1.75            | 0               | 9.34           | 48.55          | 14.65          |
| CoCuP <sub>x</sub> -CPHs | 11.24                      | 0               | 1.78            | 9.67           | 47.83          | 14.81          |

a Co, Ni and Cu loading amount in different samples were determined by the mass of Co, Ni and Cu element with ICP-MS analysis.

b P, C, and N content were measured by the X-ray photoelectron spectroscopy and CHN element analysis.

**Table S2.** The electrocatalytic performance comparison of the Co-based phosphide samples

| Samples                  | Overpotential to deliver<br>10 mA cm <sup>-2</sup> (mV) |                     |                     | Impedance <sup>a</sup><br>( $\Omega$ ) |
|--------------------------|---------------------------------------------------------|---------------------|---------------------|----------------------------------------|
|                          | HER in 0.5 M<br>H <sub>2</sub> SO <sub>4</sub>          | HER in 1.0 M<br>KOH | OER in 1.0 M<br>KOH |                                        |
| CoP <sub>x</sub> -CNFs   | 132                                                     | 201                 | 303                 | 18.9                                   |
| CoNiP <sub>x</sub> -CNFs | 105                                                     | 154                 | 269                 | 18.8                                   |
| CoCuP <sub>x</sub> -CNFs | 120                                                     | 182                 | 288                 | 19.2                                   |
| CoP <sub>x</sub> -CPHs   | 223                                                     | 290                 | 365                 | 98.3                                   |
| CoNiP <sub>x</sub> -CPHs | 206                                                     | 242                 | 337                 | 99.6                                   |
| CoCuP <sub>x</sub> -CPHs | 214                                                     | 276                 | 345                 | 99.2                                   |
| P-CNFs                   | 580                                                     | 541                 | 584                 | 18.6                                   |

<sup>a</sup> The impedance was obtained via the fitting data using the ZView software.

**Table S3.** The surface area and pore structure comparison of the Co-based phosphide samples

| <b>Samples</b>           | <b>BET surface area (m<sup>2</sup> g<sup>-1</sup>)</b> | <b>Pore diameter (nm)</b> |
|--------------------------|--------------------------------------------------------|---------------------------|
| CoP <sub>x</sub> -CNFs   | 208.4                                                  | 3.2                       |
| CoNiP <sub>x</sub> -CNFs | 215.7                                                  | 3.0                       |
| CoCuP <sub>x</sub> -CNFs | 207.2                                                  | 3.1                       |
| CoP <sub>x</sub> -CPHs   | 238.6                                                  | 3.5                       |
| CoNiP <sub>x</sub> -CPHs | 229.5                                                  | 3.8                       |
| CoCuP <sub>x</sub> -CPHs | 244.8                                                  | 3.3                       |

**Table S4.** Comparison of HER performance of CoNiP<sub>x</sub>-CNFs with those reported Co-based phosphide electrocatalysts in acid electrolytes

| Catalysts                                      | $\eta_{10}$ (mV) | Mass loading              | Substrate   | Electrolytes                         | References       |
|------------------------------------------------|------------------|---------------------------|-------------|--------------------------------------|------------------|
| CoNiP <sub>x</sub> -CNFs                       | 105              | 0.5 mg cm <sup>-2</sup>   | GCE         | 0.5 M H <sub>2</sub> SO <sub>4</sub> | <b>This work</b> |
| Ni <sub>0.67</sub> Co <sub>1.33</sub> P/N-CNFs | 100              | 0.287 mg cm <sup>-2</sup> | GCE         | 0.5 M H <sub>2</sub> SO <sub>4</sub> | S1               |
| NiCo <sub>2</sub> P <sub>x</sub> /CF           | 104              | 5.9 mg cm <sup>-2</sup>   | carbon felt | 0.5 M H <sub>2</sub> SO <sub>4</sub> | S2               |
| CoP-CNTs                                       | 139              | 0.27 mg cm <sup>-2</sup>  | GCE         | 0.5 M H <sub>2</sub> SO <sub>4</sub> | S3               |
| CoP/Co <sub>2</sub> P                          | 99               | 0.36 mg cm <sup>-2</sup>  | GCE         | 0.5 M H <sub>2</sub> SO <sub>4</sub> | S4               |
| CoP-400                                        | 113              | 0.43 mg cm <sup>-2</sup>  | GCE         | 0.5 M H <sub>2</sub> SO <sub>4</sub> | S5               |

**Table S5.** Comparison of HER performance of CoNiP<sub>x</sub>-CNFs with those reported Co-based phosphide electrocatalysts in alkaline electrolytes

| Catalysts                                | $\eta_{10}$ (mV) | Mass loading             | Substrat     | Electrolytes | References       |
|------------------------------------------|------------------|--------------------------|--------------|--------------|------------------|
| CoNiP <sub>x</sub> -CNFs                 | 154              | 0.5 mg cm <sup>-2</sup>  | GCE          | 1.0 M KOH    | <b>This work</b> |
| Cu <sub>0.3</sub> Co <sub>2.7</sub> P/NC | 220              | 0.4 mg cm <sup>-2</sup>  | RDE          | 1.0 M KOH    | S6               |
| CoP-NW array                             | 209              | 0.92 mg cm <sup>-2</sup> | carbon cloth | 1.0 M KOH    | S7               |
| Co <sub>2</sub> P/CoNPC                  | 208              | 0.39 mg cm <sup>-2</sup> | GCE          | 1.0 M KOH    | S8               |
| Co <sub>2</sub> P/CNT-900                | 132              | 0.75 mg cm <sup>-2</sup> | GCE          | 1.0 M KOH    | S9               |
| Co <sub>0.68</sub> Fe <sub>0.32</sub> P  | 116              | 0.75 mg cm <sup>-2</sup> | RRDE         | 1.0 M KOH    | S10              |



**Table S6.** Comparison of OER performance of CoNiP<sub>x</sub>-CNFs with those reported Co-based phosphide electrocatalysts in alkaline electrolytes

| Catalysts                            | $\eta_{10}$ (mV) | Mass loading              | Substrat | Electrolytes | References       |
|--------------------------------------|------------------|---------------------------|----------|--------------|------------------|
| CoNiP <sub>x</sub> -CNFs             | 269              | 0.5 mg cm <sup>-2</sup>   | GCE      | 1.0 M KOH    | <b>This work</b> |
| CoP/NCNHP                            | 310              | 0.39 mg cm <sup>-2</sup>  | GCE      | 1.0 M KOH    | S11              |
| Co-P/NC                              | 319              | 0.283 mg cm <sup>-2</sup> | RDE      | 1.0 M KOH    | S12              |
| Fe <sub>1</sub> Co <sub>2</sub> -P/C | 362              | 0.17 mg cm <sup>-2</sup>  | RDE      | 1.0 M KOH    | S13              |
| NiCoP/C                              | 330              | 0.25 mg cm <sup>-2</sup>  | RDE      | 1.0 M KOH    | S14              |
| Co <sub>2</sub> P/CoNPC              | 328              | 0.39 mg cm <sup>-2</sup>  | GCE      | 1.0 M KOH    | S8               |

**Table S7.** Comparison of overall water splitting of CoNiP<sub>x</sub>-CNFs with those reported Co-based phosphide electrocatalysts in alkaline electrolytes

| Catalysts                                      | $\eta_{10}$ (V) | Mass loading              | Substract    | Electrolytes | References       |
|------------------------------------------------|-----------------|---------------------------|--------------|--------------|------------------|
| CoNiP <sub>x</sub> -CNFs                       | 1.56            | 10 mg cm <sup>-2</sup>    | self-support | 1.0 M KOH    | <b>This work</b> |
| CoP/GO-400                                     | 1.70            | 0.28 mg cm <sup>-2</sup>  | RDE          | 1.0 M KOH    | S15              |
| Co <sub>2</sub> P/CoNPC                        | 1.64            | 0.39 mg cm <sup>-2</sup>  | GCE          | 1.0 M KOH    | S8               |
| Fe-CoP/Ti                                      | 1.60            | 1.03 mg cm <sup>-2</sup>  | Ti foil      | 1.0 M KOH    | S16              |
| Ni <sub>0.67</sub> Co <sub>1.33</sub> P/N-CNFs | 1.56            | 0.287 mg cm <sup>-2</sup> | GCE          | 1.0 M KOH    | S1               |
| Fe-CoP HTPAs                                   | 1.59            | Not available             | Ni foam      | 1.0 M KOH    | S17              |

## References

- [S1] Q. Mo, W. Zhang, L. He, X. Yu, Q. Gao, *Appl. Catal. B: Environ.*, 2019, 244, 620-627.
- [S2] R. Zhang, X. Wang, S. Yu, T. Wen, X. Zhu, F. Yang, X. Sun, X. Wang, W. Hu, *Adv. Mater.*, 2017, 29, 1605502.
- [S3] C. Wu, Y. Yang, D. Dong, Y. Zhang, J. Li, *Small*, 2017, 13, 1602873.
- [S4] L. Chen, Y. Zhang, H. Wang, Y. Wang, D. Li, C. Duan, *Nanoscale*, 2018, 10, 21019-21024.
- [S5] H. Li, X. Zhao, H. Liu, S. Chen, X. Yang, C. Lv, H. Zhang, X. She, D. Yang, *Small*, 2018, 14, 1802824.
- [S6] J. Song, C. Zhu, B. Z. Xu, S. Fu, M. H. Engelhard, R. Ye, D. Du, S. P. Beckman, Y. Lin, *Adv. Energy Mater.*, 2017, 7, 1601555.
- [S7] J. Tian, Q. Liu, A. M. Asiri, X. Sun, *J. Am. Chem. Soc.*, 2014, 136, 7587-7590.
- [S8] H. Liu, J. Guan, S. Yang, Y. Yu, R. Shao, Z. Zhang, M. Dou, F. Wang, Q. Xu, *Adv. Mater.*, 2020, 32, 2003649.
- [S9] D. Das, K. K. Nanda, *Nano Energy*, 2016, 30, 303-311.
- [S10] F. Li, Y. Bu, Z. Lv, J. Mahmood, G.-F. Han, I. Ahmad, G. Kim, Q. Zhong, J.-B. Baek, *Small*, 2017, 13, 1701167.
- [S11] Y. Pan, K. Sun, S. Liu, X. Cao, K. Wu, W. C. Cheong, Z. Chen, Y. Wang, Y. Li, Y. Liu, D. Wang, Q. Peng, C. Chen, Y. Li, *J. Am. Chem. Soc.*, 2018, 140, 2610-2618.

- [S12] B. You, N. Jiang, M. Sheng, S. Gul, J. Yano, Y. Sun, *Chem. Mater.*, 2015, 27, 7636-7642.
- [S13] W. Hong, M. Kitta, Q. Xu, *Small Methods*, 2018, 2, 1800214.
- [S14] P. He, X. Y. Yu, X. W. Lou, *Angew. Chem. Int. Ed.*, 2017, 56, 3897.
- [S15] L. Jiao, Y. X. Zhou, H. L. Jiang, *Chem. Sci.*, 2016, 7, 1690-1695.
- [S16] C. Tang, R. Zhang, W. Lu, L. He, X. Jiang, A. M. Asiri, X. Sun, *Adv. Mater.*, 2017, 29, 1602441.
- [S17] E. Hu, J. Ning, D. Zhao, C. Xu, Y. Lin, Y. Zhong, Z. Zhang, Y. Wang, Y. Hu, *Small*, 2018, 14, 1704233.
